# Supplementary material
Source: PubMed Central journal article supplement (PMC6509506)
Supplement: supp_RA118.005659_140521_2_supp_300121_pppxpm.pdf [file supp_RA118.005659_140521_2_supp_300121_pppxpm.pdf]

## Supporting Information

The chaperone ERp29 is required for tunneling nanotube formation by stabilizing MSec

Rajaiah Perugu<sup>1,2</sup>, Sunayana Dagar<sup>1,3</sup>, Harsh Kumar<sup>1,2</sup>, Rajesh Kumar<sup>4</sup>, Jayanta  
Bhattacharya<sup>4</sup> and Sivaram V.S. Mylavarapu<sup>1,2,3,#</sup>

### Supplementary figure S1

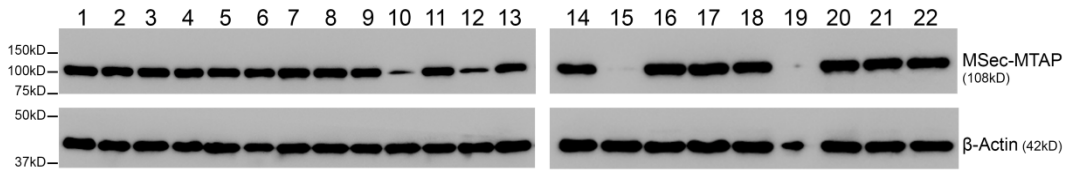

**Supplementary figure S1.** Western blot of clonally sorted stable cell lines showing expression levels of MSec-MTAP, probed using an antibody against the Flag tag in the MTAP tag. Clone 1 (lane 1) was used for the studies in this manuscript.

### Supplementary figure S2

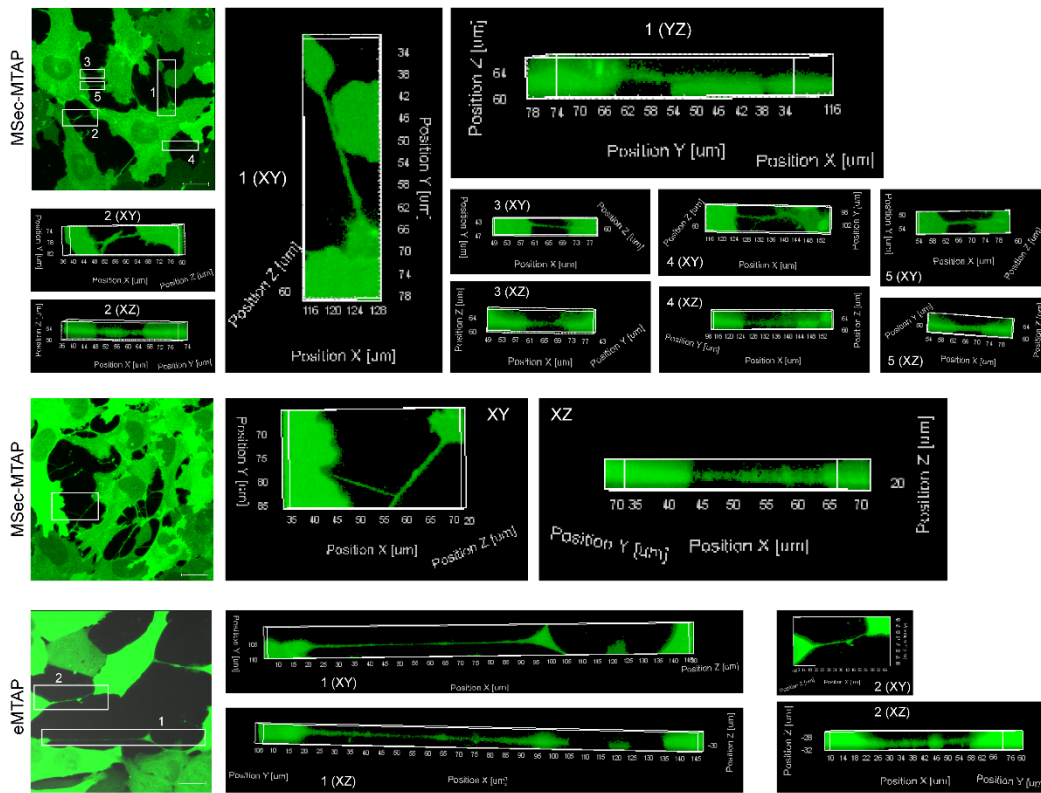

**Supplementary figure S2.** TNTs did not adhere to the substratum and “hung” between the connected cells. Confocal snapshots taken from live cells stably expressing either MSec-MTAP or

*ERp29 regulates TNT formation*

*empty-MTAP as indicated (both green). TNTs are indicated by boxes. Scale bar = 20 $\mu$ m. X-Z/ Y-Z visualization of confocal Z-stacks of TNTs that were counted in both cell lines.*

**Supplementary figure S3**

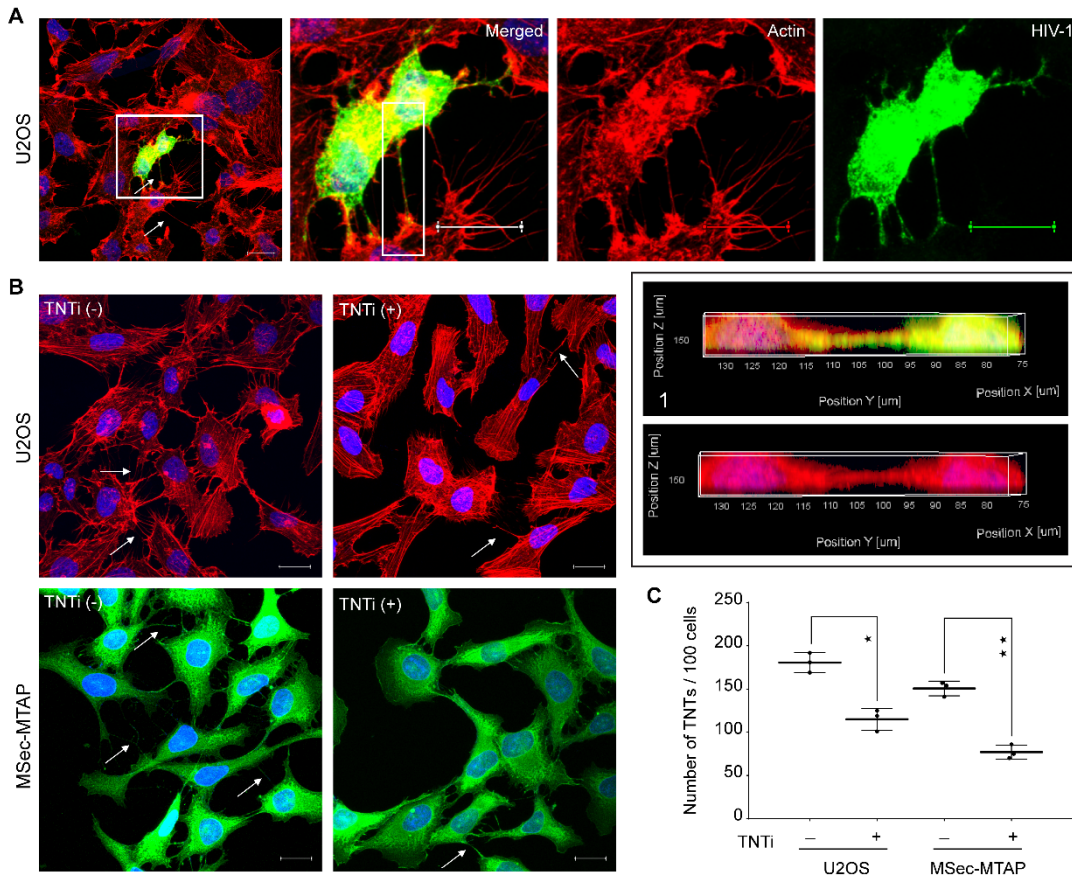

**Supplementary figure S3. Functional and structural validation of TNTs.** *A) Transfer of HIV-1 from the infected (green) towards the uninfected cell through a representative TNT (box). Y-z projection (right middle) clearly showing the TNT “hanging” between the two cell bodies with the HIV-1 signal (green) inside. B) Confocal microscopy images of cells co-stained with AlexaFluor<sup>TM</sup>594 conjugated phalloidin (red, to visualize F-actin) and DAPI (blue, to visualize the nucleus) and cells stably expressing MSec-MTAP (green) after 24 hours of TNT inhibitor (TNTi) treatment. TNTs are indicated by arrows. C) Quantification of the number of TNTs per 100 cells from the confocal images. Data represent mean  $\pm$  SD based on three independent experiments, 100 cells counted per experiment. (Paired t test, two-tailed; \* $P$ <0.05; \*\* $P$ <0.01).*

Supplementary figure S4

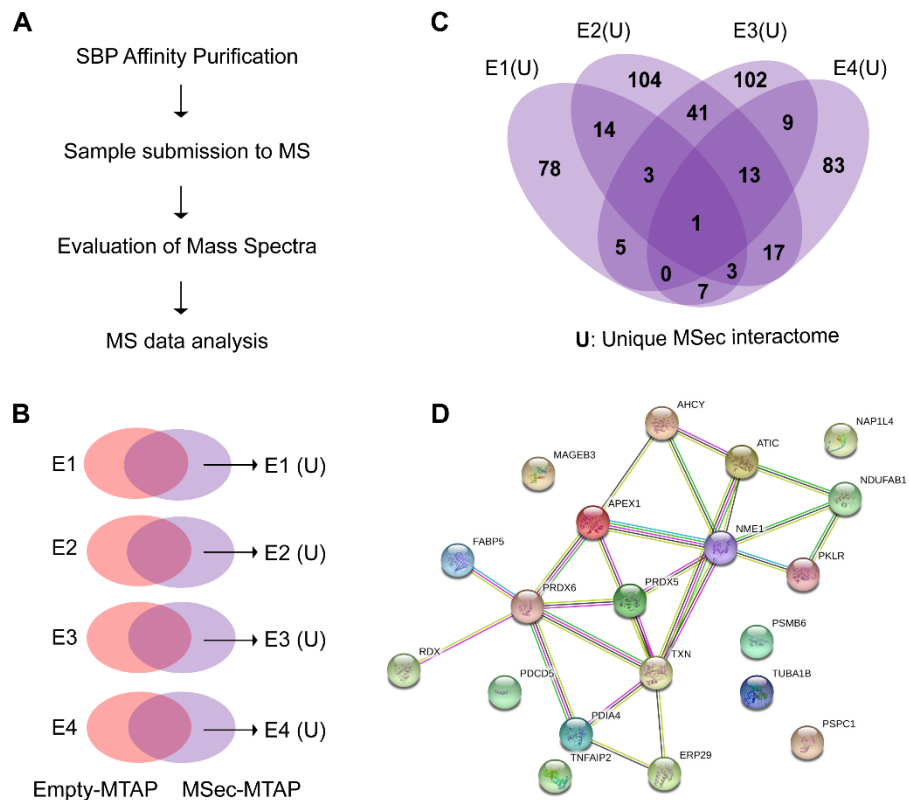

**Supplementary figure S4. Identification and analysis of the MSec interactome.** *A)* Schematic workflow for the identification of the MSec interactome. SBP affinity purification of MSec-MTAP and empty-MTAP. Mass spectra were evaluated using protein database search program (Mascot). *B)* The empty-MTAP interactome from each experiment was subtracted from its cognate MSec-MTAP interactome to obtain the respective “unique” MSec-MTAP interactomes (E1U through E4U). *C)* The unique MSec interactomes were overlapped using the Venny 2.1 software. *D)* Analysis of protein-protein interaction networks from at least three experiments of MSec interactome by STRING database.

**Supplementary figure S5**

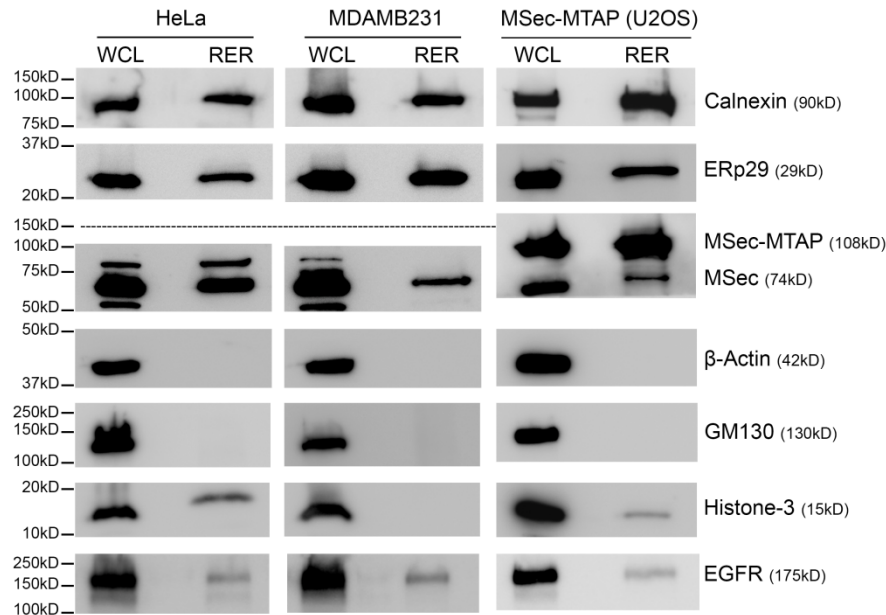

**Supplementary figure S5. MSec is associated with the ER.** Western blots of the whole cell lysate and rough endoplasmic reticulum fractions from various cell lines [HeLa cells, MDAMB231 cells and U2OS (M<sub>Sec</sub>-MTAP) cells respectively] probed for the respective proteins as indicated. ER positive marker – Calnexin, ERp29, cytosolic marker -  $\beta$ -actin, Golgi complex marker - GM130, nuclear marker Histone-3 and cell membrane marker - EGFR.

**Supplementary figure S6**

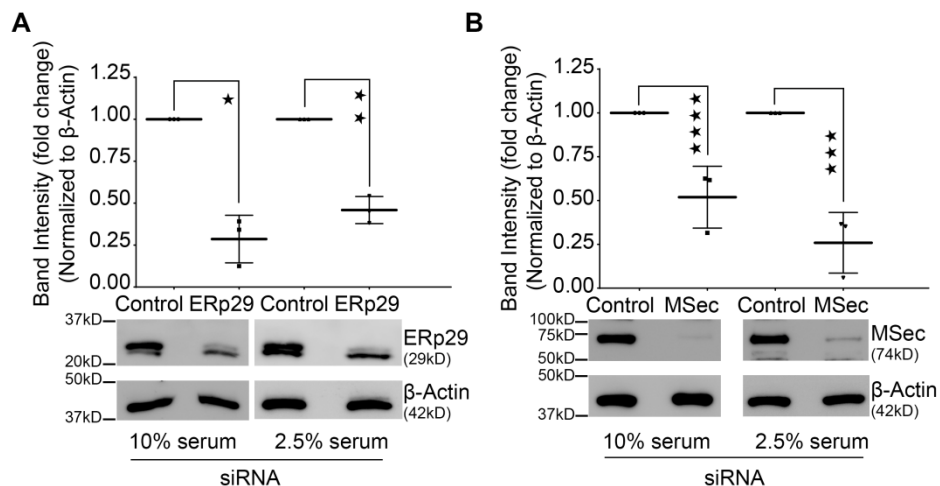

**Supplementary figure S6. Western blot analysis of ERp29 and MSec depletion using sequence-specific siRNA treatment in U2OS cells.** A) U2OS cells were transfected with ERp29 and control (luciferase) sequence-specific siRNAs respectively for 48 hours and the efficiency of knock down analyzed by immunoblotting with anti-ERp29, anti-MSec and anti- $\beta$ -actin (loading control) antibodies respectively. The fold change in expression of ERp29 or MSec protein normalized to

## ERp29 regulates TNT formation

respective  $\beta$ -actin levels was quantified from three independent experiments. (Paired *t* test, two-tailed, \* $P < 0.05$ ; \*\* $P < 0.01$ ; \*\*\* $P < 0.001$ ; \*\*\*\* $P < 0.0001$ ).

### Supplementary figure S7

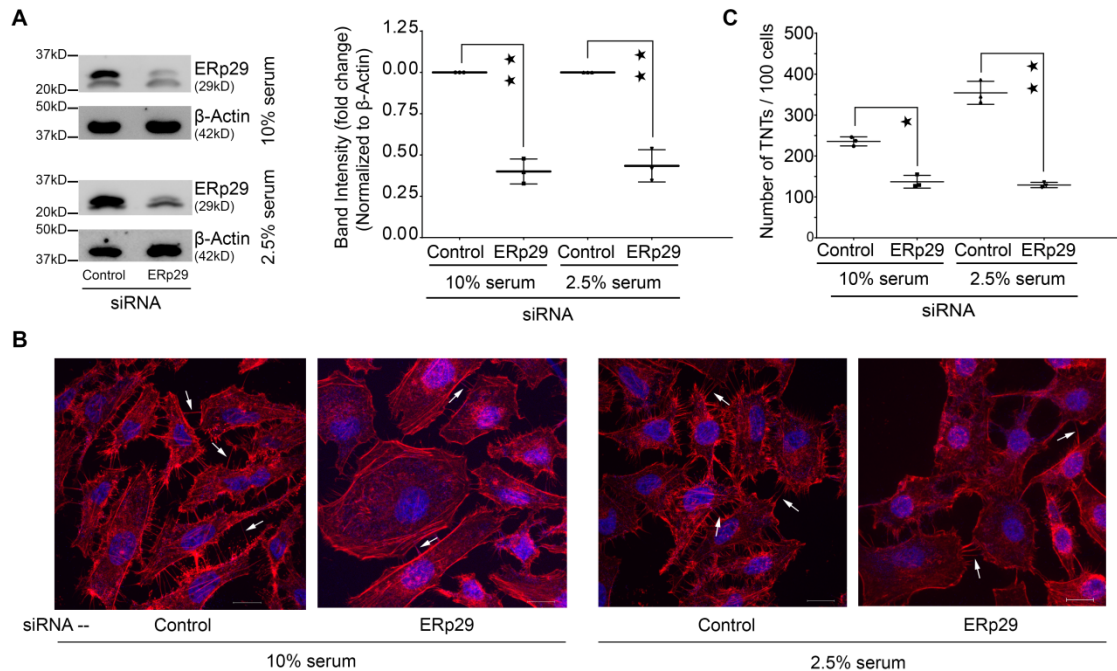

**Supplementary figure S7. ERp29 is required for TNT formation in HeLa cells.** **A)** HeLa cells were transfected with ERp29 and control (luciferase) sequence-specific siRNAs respectively for 48 hours and the efficiency of knock down analyzed by immunoblotting with anti-ERp29 and anti- $\beta$ -actin (loading control) antibodies respectively. The fold change in expression of ERp29 protein normalized to respective  $\beta$ -actin levels was quantified from three independent experiments. **B)** Confocal microscopy images of cells co-stained with AlexaFluor<sup>TM</sup>594 conjugated phalloidin (red, to visualize F-actin) and DAPI (blue, to visualize the nucleus) after 48 hours of the indicated siRNA transfection. Arrows indicate TNTs connecting neighboring cells. Scale bar, 20 $\mu$ m. **C)** Quantification of the number of TNTs per 100 cells from the confocal images in both normal (10% serum) and stress (2.5% serum) conditions respectively. Data (A and C) represent mean  $\pm$  SD based on three independent experiments, 100 cells counted per experiment. (Paired *t* test, two-tailed, \* $P < 0.05$ ; \*\* $P < 0.01$ ).

Supplementary fig S8

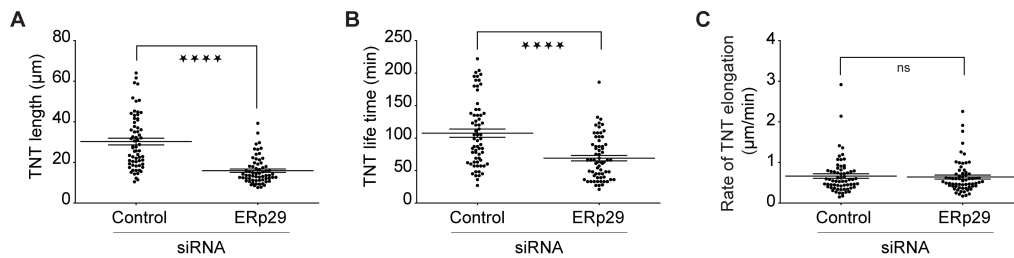

**Supplementary figure S8. Analysis of TNT length, lifetime and rate of elongation.** EMTAP U2OS cells were imaged live by confocal, time-lapse microscopy. A) Measurement of the maximal length acquired by TNTs. B) Measurement of the total lifetime of TNTs (from initiation to breakage/ cell collapse). C) Measurement of the rates of TNT elongation (from initiation to reaching maximal length). A total of 65 TNTs was counted for control and ERp29 depletion across 3 independent experiments. Data represents mean  $\pm$  SEM based on three independent experiments, 65 TNTs counted in total for each condition. (Paired *t* test, two-tailed, \*\*\*\**P*<0.0001).

Supplementary figure S9

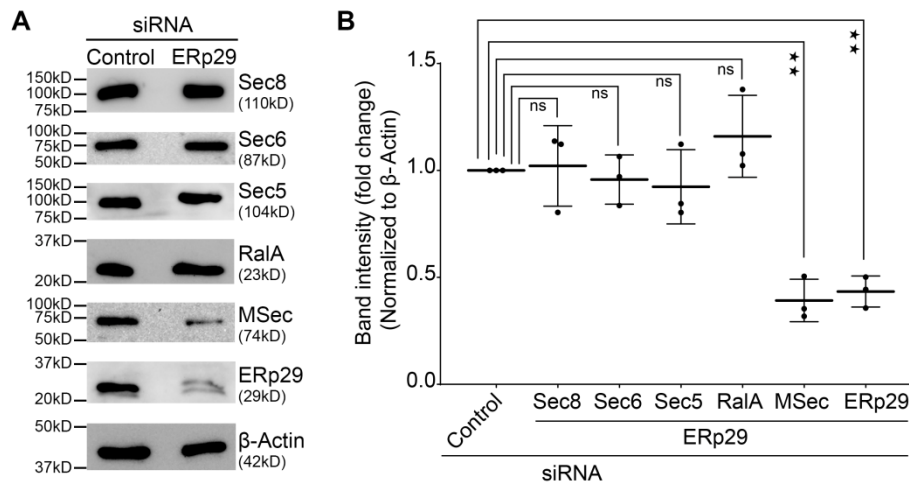

**Supplementary figure S9. ERp29 did not stabilize Exocyst complex and RalA.** A) siRNA-mediated depletion of ERp29 in U2OS cells using sequence-specific siRNAs. Control = anti-luciferase siRNA. Efficiency of knock down was analyzed by immunoblotting with anti-Sec8, anti-Sec6, anti-Sec5, anti-RalA, anti-MSec, anti-ERp29 and anti- $\beta$ -actin (loading control) antibodies respectively. B) Fold change in protein expression was quantified through densitometry from the immunoblots of three independent experiments.

Supplementary figure S10

## *ERp29 regulates TNT formation*

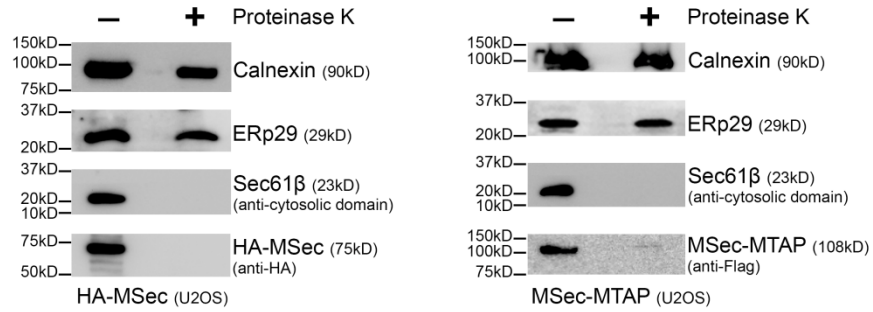

**Supplementary figure S10.** Limited proteolysis with proteinase-K (protease protection assay) reveals that stably expressed MSec (HA-MSec and MSec-MTAP) is associated with the ER towards its cytosolic site. Markers used – Calnexin (ER lumen) and Sec61β -cytosolic side (ER surface).

**Supplementary Movies 1 and 2.** Time lapse confocal images showing the transport of mitochondria (red, stained with Mitotracker red) from one cell to another through TNTs (green).

**Supplementary tables**

*ERp29 regulates TNT formation*

**Supplementary table S1.** Mouse MSec cDNA cloned into (pcDNA4-TO-Hygromycin-mVenus-MAP; Addgene #44099) in between HindIII and BamHI sites.

```
AAGCTTCCATGCTCTGAGGCGTCCTCTGAGGACCTGATGCCATCCCCGGAGGCTCCCGATGGGGAGGAGGA
GTCTGCGAAGAAGAAGGAGAAGAAGTCCAAAGGACTGGCCAACATGTTCAAGTGTCTTCACCAAAGGGAAA
AAGAAAAAAAAAGGACCAGCCAGATTATCAGATCTGGAAGTGCAGCCCAAGCCCAGGCCCGAGTTAGATG
GTCCACTGCCCACAGTGGAGGAGCTCAAGGAGGCCCTGGAGCACGGGCGGCTGGAGGTGGCCTGGCAGGT
GCTGGCGTTGGAGAGGCAGCTCGAGGCTGCGGCAGCGGGCGGTTGGCATGAGCAACGAGGAGCTGGTGTGG
CGGCAGAGCAAGGTGGAGGCTCTGTACGTGCTGCTTTGCGACCAGGTGCTCGGGGTACTGCGGCGGCCGC
TGGAGGCGGGCGCCCGAGCGGCTGAGCCAGGCGCTAGCCGTGGTGTGCGCAGGAGGAGCTCGAGGACCGGCG
GGCGTCCGGGGGACCCTTGGCGGCGGCACTGGAGGCCACGCGCCCGCGGCGATGGCTGCAGCGGTGGAGG
GGCGTGGTGGCGGAGGTGGCAGCGGAACGTCTGGACGCGCAGCCGGCCACAGCGCCCGAGGGCCGCTCGG
AGGCGGAGAGCAGGTTCCCTGCACATGGGTGCGACCATGAAGGAGGACCTGGAGGTGGTGGTGGAGAGGCT
GAAGCCGCTGTTCCCCGACGAGTTCAACGTCGTGCGCACCTACGCCGAAAGCTACCACTACCACTTCGCC
AGCCACCTGTGCGCCTTGGCGCAGTTCGAGTTGTGTGAAAGGGATACCTACTTGTGCTGCTCTGGGTGC
AGAACCTCTACCCCAATGATATTCTCAACAGCCCCAAGTTGGCACAGGAGCTTCAAGGTGTGGGCTTGG
GAGCCTCTGCCCAAGCAGATCAGATTGCTGGAGGCCATGTTCTTGTCCAATGAGGTGACCAGCGTG
AAGCAGCTCATGGCCCCGAGCTTTAGAGCTGGAGTCTCAGCGCTGGACCCAGGATGTGGCTCCCCAGGCC
TGGATGGCCACTGTACAGTGTGCTGGCCATCGACATTCTCCAGATCATTTTACAAGGCCAGACTAAGGC
TGAGAACATCACTTCGACGCTGGGGATGCAGATAAAGCAGTTGCTGCTGGTGGAGCTGGCTGCACTACTG
AGGAGCTACCAGCGCGCCTTTGATGAGTTTCTAGAGAAGAGCAAACCTCCTGAGGAATTACAGAGTCAACA
TCATGGCCAACATCAACAACCTGCCTGTTCTTCTGGACTTCCGTGGAGCAGAAATGGCAGATATCTCATGA
TTCTCTGAACCGCCTGCTGGAGCCTTTGAAAGACCTCAAGGCCCATGGCTTCGACACCCTGCTCCAGAGC
CTATTTTTGGACCTGAAGCCGCTGTTTAAAGAAGTTCACACAGACCCGTTGGGCAAATCCAGTTGAGACCC
TGGAGGAAATCATCACTACTGTGAGCAGCAGCCTGCCTGAATTCTCAGAGCTGCAGGACTGTTTCCGGGA
GGAGCTCATGGAGACTGTGCACCTGCACCTAGTGAAGAATACATCATCAGGCTCTGCAAACGGCGCCTG
GTCCTCAAGACGGCCGAGCAGCAGCAGCTGGCAAGGCACATCCTGGCCAACGCGGATGCCATTTCAGG
GGTTCTGCACTGAGAATGGCTCCACTGCAACCTGGCTGCACCGCGCCCTCCCTATGATTGCTGAGATCAT
TCGCCTGCAAGATTCCAGTGCCATTAAGATCGAGGTGGCCACATACGCCACTTGGTACCCTGACTTCAGC
AAAGGCCACCTGAACGCCATCCTGGCCATCAAGGGCAATCTACCAAGCAGTGAAGTCAGGAGCATCCGGA
ACATACTGGACATCAACACGGGAGTGCAGGAGCCTCCCAGGCCCTGTTCTCCCTTATAAAGGTTACTGG
ATCCACTAGTCCAGTGTGGTGGAAATTCTGCAGATATCCAGCACAGTGGCGGCCGCGGCAGCAGC atggtg
agcaagggcgaggagctgttcaccgggggtggtgcccatcctggtcgagctggacggcgacgtaaacggcc
acaagttcagcgtgtccggcgagggcgagggcgatgccacctacggcaagctgacctgaagctgatctg
caccaccggcaagctgcccgtgccctggcccacctcgtgaccacctgggctacggcctgcagtgcttc
gcccgtaccgccaccacatgaagcagcagcacttctcaagtccgcatgcccgaaggctacgtccagg
agcgcaccatcttctcaaggacgacggcaactacaagaccgcccggaggtgaagttcgagggcgacac
cctggtgaaccgcatcgagctgaaggcatcgacttcaaggaggacggcaacatcctggggcacaagctg
gagtacaactacaacagccacaacgtctatatcaccgcccgaacagcagaagaacggcatcaaggccaact
tcaagatccgcccacaacatcgaggacggcagcctcgagtccgctcatcaccatcaccatcaccatcagg
cagcgcctggaagcagaagaccaccggctggcgggggcgccacgtggtggagggcctggccggcgagctg
gagcagctgccccgaggctggagcaccacctcagggccagcgggagccctccggcggggtagcgtg
actacaaagacgatgacgacaagggcagcgttagcagcggcgggcggtgcagctcgccgaccactacca
gcagaacacccccatcgggcgacggccccgtgctgctgcccgacaaccactacctgagctaccagtccaag
ctgagcaaagaccccaacgagaagcgcgatcacatggctcctgaaggagcgcgtgaccgcccgggatca
ctctcggcagtgacgagctgtacaagtaaTCTAGA
```

**Supplementary table S2.** MSec interactome appearing in at least three experiments.



*ERp29 regulates TNT formation*

| S.No | Protein Name                                  | Accession # | Database from which it is derived | # of distinct peptides assigned for each protein |            |            |            | % coverage of each protein assigned |    |    |    |
|------|-----------------------------------------------|-------------|-----------------------------------|--------------------------------------------------|------------|------------|------------|-------------------------------------|----|----|----|
|      |                                               |             |                                   | E1                                               | E2         | E3         | E4         | E1                                  | E2 | E3 | E4 |
| 1    | Endoplasmic reticulum resident protein 29     | ERP29_HUMAN | SwissProt 57.15                   | 9<br>(4)                                         | 4<br>(1)   | 5<br>(2)   | 11<br>(2)  | 22                                  | 18 | 19 | 19 |
| 2    | DNA-(apurinic or apyrimidinic site) lyase     | APEX1_HUMAN | SwissProt 57.15                   | 4<br>(1)                                         | 5<br>(2)   | 4<br>(2)   | -          | 11                                  | 16 | 16 | -  |
| 3    | Peroxiredoxin-6                               | PRDX6_HUMAN | SwissProt 57.15                   | 2<br>(1)                                         | 2<br>(2)   | 6<br>(5)   | -          | 16                                  | 6  | 15 | -  |
| 4    | Paraspeckle component 1                       | PSPC1_HUMAN | SwissProt 57.15                   | 3(1)                                             | 2<br>(1)   | 2<br>(1)   | -          | 11                                  | 4  | 5  | -  |
| 5    | Adenosyl homocysteinase                       | SAHH_HUMAN  | SwissProt 57.15                   | 4<br>(2)                                         | 5<br>(3)   | -          | 8<br>(3)   | 4                                   | 8  | -  | 13 |
| 6    | Radixin                                       | RADI_HUMAN  | SwissProt 57.15                   | 6<br>(3)                                         | 9<br>(2)   | -          | 5<br>(3)   | 12                                  | 11 | -  | 5  |
| 7    | Nucleosome assembly protein 1-like 4          | NP1L4_HUMAN | SwissProt 57.15                   | 3<br>(1)                                         | 4<br>(1)   | -          | 3<br>(1)   | 8                                   | 11 | -  | 8  |
| 8    | Tubulin alpha-1B chain                        | TBA1B_HUMAN | SwissProt 57.15                   | -                                                | 24<br>(19) | 35<br>(23) | 61<br>(43) | -                                   | 34 | 47 | 47 |
| 9    | Pyruvate kinase isozymes R/L                  | KPYR_HUMAN  | SwissProt 57.15                   | -                                                | 5<br>(3)   | 5<br>(1)   | 4<br>(2)   | -                                   | 3  | 3  | 4  |
| 10   | Splicing factor, arginine/serine- rich 2B     | SFR2B_HUMAN | SwissProt 57.15                   | -                                                | 2<br>(1)   | 1<br>(1)   | 6<br>(2)   | -                                   | 8  | 2  | 8  |
| 11   | Peroxiredoxin-5, mitochondrial                | PRDX5_HUMAN | SwissProt 57.15                   | -                                                | 3<br>(1)   | 4<br>(2)   | 3<br>(1)   | -                                   | 26 | 24 | 8  |
| 12   | Proteasome subunit beta type-6                | PSB6_HUMAN  | SwissProt 57.15                   | -                                                | 1<br>(1)   | 1<br>(1)   | 2<br>(2)   | -                                   | 4  | 4  | 4  |
| 13   | Programmed cell death protein 5               | PDCD5_HUMAN | SwissProt 57.15                   | -                                                | 3<br>(2)   | 4<br>(2)   | 3<br>(1)   | -                                   | 17 | 28 | 17 |
| 14   | Fatty acid-binding protein, epidermal         | FABP5_HUMAN | SwissProt 57.15                   | -                                                | 2<br>(1)   | 3<br>(1)   | 3<br>(1)   | -                                   | 6  | 17 | 14 |
| 15   | Bifunctional purine biosynthesis protein PURH | PUR9_HUMAN  | SwissProt 57.15                   | -                                                | 3<br>(1)   | 3<br>(1)   | 2<br>(1)   | -                                   | 7  | 9  | 2  |
| 16   | Acyl carrier protein, mitochondrial           | ACPM_HUMAN  | SwissProt 57.15                   | -                                                | 2<br>(1)   | 3<br>(2)   | 4<br>(1)   | -                                   | 8  | 14 | 13 |
| 17   | Melanoma-associated antigen B3                | MAGB3_HUMAN | SwissProt 57.15                   | -                                                | 2<br>(1)   | 3<br>(0)   | 7<br>(3)   | -                                   | 4  | 4  | 13 |
| 18   | Nucleoside diphosphate kinase A               | NDKA_HUMAN  | SwissProt 57.15                   | -                                                | 2<br>(1)   | 3<br>(1)   | 12<br>(6)  | -                                   | 17 | 21 | 46 |
| 19   | Protein disulfide-isomerase A4                | PDIA4_HUMAN | SwissProt 57.15                   | -                                                | 3<br>(0)   | 4<br>(2)   | 1<br>(0)   | -                                   | 3  | 5  | 1  |
| 20   | Thioredoxin                                   | THIO_HUMAN  | SwissProt 57.15                   | -                                                | 1<br>(1)   | 4<br>(1)   | 5<br>(1)   | -                                   | 12 | 10 | 31 |

Note: Numbers in parantheses refer to the number of distinct peptides with significant matches.

**Supplementary table S3.** PANTHER Gene Ontology (GO) terms assigned to the MSec interactome.

*ERp29 regulates TNT formation*

| GO terms                                                                           | GO ID        | Number of hits                                                         |
|------------------------------------------------------------------------------------|--------------|------------------------------------------------------------------------|
| PANTHER GO-Slim molecular function (Total # genes: 19; Total # function hits: 17)  |              |                                                                        |
| Binding                                                                            | (GO:0005488) | TBA1B, NP1L4, ACPM, PRDX6, PSPC1                                       |
| Structural molecular activity                                                      | (GO:0005198) | TBA1B, RADI                                                            |
| Molecular function regular                                                         | (GO:0098772) | NP1L4                                                                  |
| Catalytic activity                                                                 | (GO:0003824) | PRDX5, PDIA4, PRDX6, KPYR, NDKA, PUR9, PSB6, APEX1, SAHH               |
| PANTHER GO-Slim Biological process (Total # genes: 19; Total # process hits: 22)   |              |                                                                        |
| reproduction                                                                       | (GO:0000003) | MAGB3                                                                  |
| response to stimulus                                                               | (GO:0050896) | PRDX5, PRDX6, PDIA4, KPYR                                              |
| developmental process                                                              | (GO:0032502) | RADI                                                                   |
| cellular process                                                                   | (GO:0009987) | NP1L4, PDIA4, RADI, MAGB3                                              |
| metabolic process                                                                  | (GO:0008152) | PRDX5, PRDX6, NP1L4, ACPM, KPYR, NDKA, PUR9, PSB6, APEX1,              |
| biological regulation                                                              | (GO:0065007) | PRDX1,                                                                 |
| Biogenesis                                                                         | (GO:0071840) | TBA1B, NP1L4                                                           |
| PANTHER GO-Slim Cellular component (Total # genes: 19; Total # component hits: 18) |              |                                                                        |
| supramolecular complex                                                             | (GO:0099080) | TBA1B                                                                  |
| protein-containing complex                                                         | (GO:0032991) | PSB6                                                                   |
| organelle                                                                          | (GO:0043226) | ERP29, PDIA4, PSPC1, PDCD5, PSB6                                       |
| cell                                                                               | (GO:0005623) | PRDX5, PRDX6, PDIA4, TBA1B, KPYR, ERP29, PDCD5, RADI, PSB6, SAHH, ACPM |
| PANTHER Protein class (Total # genes: 19; Total # protein class hits: 13)          |              |                                                                        |
| membrane traffic protein                                                           | (PC00150)    | ERP29                                                                  |
| hydrolase                                                                          | (PC00121)    | PUR9, PSB6, SAHH                                                       |
| oxidoreductase                                                                     | (PC00176)    | PRDX6                                                                  |
| cell adhesion molecule                                                             | (PC00069)    | MAGB3                                                                  |
| enzyme modulator                                                                   | (PC00095)    | NP1L4, PDCD5                                                           |
| transfer/carrier protein                                                           | (PC00219)    | ACPM                                                                   |
| transferase                                                                        | (PC00220)    | PUR9                                                                   |
| nucleic acid binding                                                               | (PC00171)    | PSPC1                                                                  |
| cytoskeletal protein                                                               | (PC00085)    | TBA1B, RADI                                                            |
| PANTHER pathway (Total # genes: 19; Total # pathway hits: 10)                      |              |                                                                        |
| Pyruvate metabolism                                                                | (P02772)     | KPYR                                                                   |
| Gonadotropin-releasing hormone receptor pathway                                    | (P06664)     | TBA1B                                                                  |
| De novo pyrimidine deoxyribonucleotide biosynthesis                                | (P02739)     | NDKA                                                                   |
| De novo purine biosynthesis                                                        | (P02738)     | NDKA, PUR9                                                             |
| De novo pyrimidine ribonucleotides biosynthesis                                    | (P02740)     | NDKA                                                                   |
| Hypoxia response via HIF activation                                                | (P00030)     | THIO                                                                   |
| Glycolysis                                                                         | (P00024)     | KPYR                                                                   |
| Parkinson disease                                                                  | (P00049)     | PSB6                                                                   |
| Oxidative stress response                                                          | (P00046)     | THIO                                                                   |

**Supplementary table S4.** Analysis summary of MSec interactome appearing in at least three experiments (analyzed by PANTHER)

*ERp29 regulates TNT formation*

|                                                             |                                                              |                       |          |                       |          |
|-------------------------------------------------------------|--------------------------------------------------------------|-----------------------|----------|-----------------------|----------|
| Analysis type                                               | PANTHER Overrepresentation Test (Released 20181113)          |                       |          |                       |          |
| Annotation Version and Release Date                         | Reactome version 65 Released 2018-06-12                      |                       |          |                       |          |
| Analyzed list                                               | Client Text Box Input (Homo sapiens)                         |                       |          |                       |          |
| Reference list                                              | Homo sapiens (all genes in database)                         |                       |          |                       |          |
| Test type                                                   | Binomial                                                     |                       |          |                       |          |
| Correction                                                  | Used the Bonferroni correction for multiple testing          |                       |          |                       |          |
| <b>Results</b>                                              | Displayed only results for Bonferroni-corrected for P < 0.05 |                       |          |                       |          |
|                                                             |                                                              | Reference list        |          | Client text box input |          |
| Mapped IDs                                                  |                                                              | 20996 out of 20996    |          | 19 out of 19          |          |
| Unmapped IDs                                                |                                                              | 0                     |          | 1                     |          |
| Multiple mapping information                                |                                                              | 0                     |          | 0                     |          |
| <b>Annotation Data Set</b>                                  | Homo sapiens (REF)                                           | Client text box input |          |                       |          |
|                                                             | #                                                            | #                     | Expected | Fold enrichment       | P value  |
| PANTHER pathways (Bonferroni count: 152)                    |                                                              |                       |          |                       |          |
| 1) De novo purine biosynthesis                              | 29                                                           | 2                     | 0.03     | 76.21                 | 4.88E-02 |
| 2) Unclassified                                             | 18402                                                        | 13                    | 16.65    | 0.78                  | 0.00E+00 |
| PANTHER GO-Slim molecular function (Bonferroni count: 462)  |                                                              |                       |          |                       |          |
| 1) Unclassified                                             | 11259                                                        | 5                     | 10.19    | 0.49                  | 0.00E+00 |
| PANTHER GO-Slim biological process (Bonferroni count: 1467) |                                                              |                       |          |                       |          |
| 1) Unclassified                                             | 10756                                                        | 6                     | 9.73     | 0.62                  | 0.00E+00 |
| PANTHER GO-Slim cellular component (Bonferroni count: 383)  |                                                              |                       |          |                       |          |
| 1) Unclassified                                             | 11922                                                        | 7                     | 10.79    | 0.65                  | 0.00E+00 |
| PANTHER Protein class (Bonferroni count: 203)               |                                                              |                       |          |                       |          |
| 1) Unclassified                                             | 12726                                                        | 7                     | 11.52    | 0.61                  | 0.00E+00 |
| GO molecular function complete (Bonferroni count: 2783)     |                                                              |                       |          |                       |          |
| 1) Unclassified                                             | 3290                                                         | 1                     | 2.98     | 0.34                  | 0.00E+00 |
| GO biological process complete (Bonferroni count: 8749)     |                                                              |                       |          |                       |          |
| 1) Cell redox homeostasis                                   | 77                                                           | 5                     | 0.07     | 71.76                 | 6.47E-05 |
| 2) Unclassified                                             | 3224                                                         | 1                     | 2.92     | 0.34                  | 0.00E+00 |
| GO cellular component complete (Bonferroni count: 1423)     |                                                              |                       |          |                       |          |
| 1) Extracellular exosome                                    | 2096                                                         | 11                    | 1.9      | 5.8                   | 4.91E-04 |
| 2) Extracellular vesicle                                    | 2117                                                         | 11                    | 1.92     | 5.74                  | 5.43E-04 |
| 3) Vesicle                                                  | 3812                                                         | 13                    | 3.45     | 3.77                  | 2.98E-03 |
| 4) Extracellular organelle                                  | 2119                                                         | 11                    | 1.92     | 5.74                  | 5.49E-04 |
| 5) Extracellular region part                                | 3529                                                         | 12                    | 3.19     | 3.76                  | 1.12E-02 |
| 6) Extracellular space                                      | 3335                                                         | 12                    | 3.02     | 3.98                  | 6.12E-03 |
| 7) Unclassified                                             | 2169                                                         | 1                     | 1.96     | 0.51                  | 0.00E+00 |
| Reactome pathways (Bonferroni count: 1974)                  |                                                              |                       |          |                       |          |
| 1) Unclassified                                             | 10452                                                        | 8                     | 9.46     | 0.85                  | 0.00E+00 |

**Supplementary table S4 (continued).** Analysis summary of MSec interactome appearing in at least three experiments (analyzed by PANTHER)

|                            |                              |
|----------------------------|------------------------------|
| <b>Annotation Data Set</b> | <b>Client text box input</b> |
|----------------------------|------------------------------|

*ERp29 regulates TNT formation*

|                                                             |    |                                                                                        |
|-------------------------------------------------------------|----|----------------------------------------------------------------------------------------|
| PANTHER pathways (Bonferroni count: 152)                    |    |                                                                                        |
| 1) De novo purine biosynthesis                              | 2  | NDKA, PUR9                                                                             |
| 2) Unclassified                                             | 13 | PRDX5, PRDX6, NP1L4, ACPM, PDIA4, ERP29, MAGB3, PSPC1, PDCD5, RADI, FABP5, APEX1, SAHH |
| PANTHER GO-Slim molecular function (Bonferroni count: 462)  |    |                                                                                        |
| 1) Unclassified                                             | 5  | ERP29, MAGB3, PDCD5, FABP5, THIO                                                       |
| PANTHER GO-Slim biological process (Bonferroni count: 1467) |    |                                                                                        |
| 1) Unclassified                                             | 6  | ERP29, PSPC1, PDCD5, FABP5, SAHH, THIO                                                 |
| PANTHER GO-Slim cellular component (Bonferroni count: 383)  |    |                                                                                        |
| 1) Unclassified                                             | 7  | THIO, NP1L4, NDKA, MAGB3, PUR9, FABP5, APEX1                                           |
| PANTHER Protein class (Bonferroni count: 203)               |    |                                                                                        |
| 1) Unclassified                                             | 7  | PRDX5, THIO, PDIA4, KPYR, NDKA, FABP5, APEX1                                           |
| GO molecular function complete (Bonferroni count: 2783)     |    |                                                                                        |
| 1) Unclassified                                             | 1  | MAGB3                                                                                  |
| GO biological process complete (Bonferroni count: 8749)     |    |                                                                                        |
| 1) Cell redox homeostasis                                   | 5  | PRDX5, PRDX6, THIO, PDIA4, APEX1                                                       |
| 2) Unclassified                                             | 1  | MAGB3                                                                                  |
| GO cellular component complete (Bonferroni count: 1423)     |    |                                                                                        |
| 1) Extracellular exosome                                    | 11 | PRDX5, PRDX6, THIO, KPYR, NDKA, PUR9, PDCD5, RADI, FABP5, PSB6, SAHH                   |
| 2) Extracellular vesicle                                    | 11 | PRDX5, PRDX6, THIO, KPYR, NDKA, PUR9, PDCD5, RADI, FABP5, PSB6, SAHH                   |
| 3) Vesicle                                                  | 13 | ERP29, PDIA4, PRDX5, PRDX6, THIO, KPYR, NDKA, PUR9, PDCD5, RADI, FABP5, PSB6, SAHH     |
| 4) Extracellular organelle                                  | 11 | PRDX5, PRDX6, THIO, KPYR, NDKA, PUR9, PDCD5, RADI, FABP5, PSB6, SAHH                   |
| 5) Extracellular region part                                | 12 | PDIA4, PRDX5, PRDX6, THIO, KPYR, NDKA, PUR9, PDCD5, RADI, FABP5, PSB6, SAHH            |
| 6) Extracellular space                                      | 12 | PDIA4, PRDX5, PRDX6, THIO, KPYR, NDKA, PUR9, PDCD5, RADI, FABP5, PSB6, SAHH            |
| 7) Unclassified                                             | 1  | MAGB3                                                                                  |
| Reactome pathways (Bonferroni count: 1974)                  |    |                                                                                        |
| 1) Unclassified                                             | 8  | PRDX5, NP1L4, PDIA4, KPYR, ERP29, MAGB3, PSPC1, PDCD5                                  |

**Supplementary table S5.** Primers used for RT-qPCR and site directed mutagenesis.

| Name | Primer sequence (5'-3')  |
|------|--------------------------|
| MSec | Sense: TCAAGAGGTTACGCACA |

*ERp29 regulates TNT formation*

|         |                                                                                                               |
|---------|---------------------------------------------------------------------------------------------------------------|
|         | Antisense: CCCTTGCTGAGTTGGATG                                                                                 |
| ERp29   | Sense: CTTTGAGAACCCAGTCCC<br>Antisense: GTTATCTTGCCCCTGCTT                                                    |
| 18S     | Sense: GAGGGACAAGTGGCGTTCA<br>Antisense: CCGGACATCTAAGGGCATCA                                                 |
| (D61A)  | Sense: AGTTCGTCTTGGTGAAGTTCGCCACCCAGTACCCCTACGGTGA<br>Antisense: TCACCGTAGGGGTACTGGGTGGCGAACTTCACCAAGACGAACT  |
| (Y64S)  | Sense: TGGTGAAGTTCGACACCCAGTCCCCCTACGGTGAGAAGCAGGA<br>Antisense: TCCTGCTTCTCACCGTAGGGGGACTGGGTGTCGAACTTCACCA  |
| (Y66K)  | Sense: AGTTCGACACCCAGTACCCCAAGGGTGAGAAGCAGGATGAGTT<br>Antisense: AACTCATCCTGCTTCTCACCCCTGGGGTACTGGGTGTCGAACT  |
| (Y96Q)  | Sense: CAGAGGTGGGGATCTCAGATCAAGGTGACAAGCTGAACATGGA<br>Antisense: TCCATGTTTACGCTTGTCACCTTGATCTGAGATCCCCACCTCTG |
| (P116D) | Sense: AGCTGGACAAAGAGAGCTACGACGTCTTCTACCTCTTCCGGGA<br>Antisense: TCCCGGAAGAGGTAGAAGACGTCGTAGCTCTCTTTGTCCAGCT  |
| (C157S) | Sense: TCTACCTAGGTATGCCTGGTAGCCTGCCTGTATACGACGCCCT<br>Antisense: AGGGCGTCGTATACAGGCAGGCTACCAGGCATACCTAGGTAGA  |
